## RESEARCH ARTICLE

# Vulnerability to Sexually Transmitted Infections (STI) / Human Immunodeficiency Virus (HIV) among adolescent girls and young women in India: A rapid review

Sohini Paul<sup>1</sup>\*, Anupam Sharma<sup>2</sup>, Radhika Dayal<sup>1</sup>, Mahika Mehta<sup>1</sup>, Sudeshna Maitra<sup>1</sup>, Kuhika Seth<sup>3</sup>, Monal Nagrath<sup>3</sup>, Sowmya Ramesh<sup>4</sup>, Niranjana Saggurti<sup>5</sup>

**1** Population Council Consulting Pvt Ltd, Delhi, India, **2** Indian Institute of Technology, Gandhinagar, Gujarat, India, **3** International AIDS Vaccine Initiative, Delhi, India, **4** Population Council Institute, Delhi, India, **5** Population Council, Delhi, India

✉ Current address: Zone 5A, India Habitat Center, New Delhi, India

\* [spaul@pccconsulting.co.in](mailto:spaul@pccconsulting.co.in)

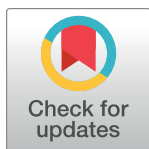

## OPEN ACCESS

**Citation:** Paul S, Sharma A, Dayal R, Mehta M, Maitra S, Seth K, et al. (2024) Vulnerability to Sexually Transmitted Infections (STI) / Human Immunodeficiency Virus (HIV) among adolescent girls and young women in India: A rapid review. *PLoS ONE* 19(2): e0298038. <https://doi.org/10.1371/journal.pone.0298038>

**Editor:** Ajoke Basirat Akinola, Noida International University, INDIA

**Received:** August 28, 2023

**Accepted:** January 16, 2024

**Published:** February 14, 2024

**Copyright:** © 2024 Paul et al. This is an open access article distributed under the terms of the [Creative Commons Attribution License](https://creativecommons.org/licenses/by/4.0/), which permits unrestricted use, distribution, and reproduction in any medium, provided the original author and source are credited.

**Data Availability Statement:** All relevant data are within the paper and its [Supporting Information](#) files, namely, "Summary Findings Individual Studies\_270823."

**Funding:** This project was funded by the International AIDS Vaccine Institute (IAVI) (<https://www.iavi.org/>) under grant number AI0622 to Population Council Consulting Pvt Ltd. SP, RD, SM, MM received the grant. AS from IIT Gandhinagar, SR from PCI and NS from PCLO

## Abstract

Limited evidence is available on the vulnerability of Adolescent Girls and Young Women (AGYW) to sexual risk behaviour and STI/HIV. Though there are almost no statistics available on vulnerability, related literature suggests that AGYW have low awareness about sexual risk behaviour/ transmission and the prevalence of STI/HIV, making them vulnerable. We conducted a rapid review of peer-reviewed studies addressing transmission network, prevalence, incidence awareness, common determinants of sexual risk behaviour/STI/HIV, health-seeking behaviour and existing interventions addressing the situation among AGYW (age 15–24) to inform the evidence gap in this crucial area of research. We registered the study in PROSPERO (CRD42023403713). We developed detailed inclusion/exclusion criteria, searched JSTOR, PubMed, Google Scholar, Science Direct and Population Council Knowledge Commons databases and followed the guidance from Cochrane Rapid Review to develop the rapid review. We also searched the bibliography of the included studies. We included the English language peer-reviewed quantitative, qualitative, mixed method studies published from Jan 1 2000 to Mar 31 2023. Six reviewers extracted data, and the seventh reviewer independently assessed the quality. Ninety-six studies met the inclusion criteria. We used descriptive statistics and narrative synthesis methods for data analysis. We also conducted a Risk of Bias Assessment (RoB) to check the quality of the included studies. Inadequate literature was found on the transmission network. Prevalence and awareness of STI/HIV are low among AGYW. However, Female Sex Workers, sex-trafficked women or drug users in this age group suffer more. Age, education, income, relationship dynamics with spouses/partners, multiple partners, and substance use are crucial in determining STI/HIV. Traditional sources of health seeking are more popular than formal sources because of social stigma. Mass media campaigns, community mobilization programs, and life skills training programs increase awareness about HIV, condom use and self-efficacy. The inclusion of only English language studies and not conducting meta-analysis because of high heterogeneity are some of the limitations of the study.

collaborated with the PCC group of researchers to develop the paper. KS and MN from the donor agency are the coauthors in this research who had a significant role in the preparation of the manuscript.

**Competing interests:** The authors have declared that no competing interests exist.

## Introduction

Sexually Transmitted Infections (STI) / Human Immunodeficiency Virus (HIV) vulnerability among adolescent girls and young women (AGYW) is a serious concern in developing nations, even though HIV prevalence has declined globally by 38% during 2010–2022 [1]. India has approximately 2.3 (1.8–3.0) million people living with HIV/AIDS; most of these are individuals over the age of 15 years [2], and 6% of the adult population suffers from one or more STIs at any one time [3]. While 39 million people have HIV globally [WHO 2023a], out of which 1.75 million are adolescents [4]. However, no statistics are available for the AGYW community on their vulnerability to STI and HIV infection, a major gap in the backdrop of Sustainable Development Goal 3.3, which aims to end the HIV epidemic by 2030 [5]. Adolescent Girls and Young Women (AGYW) are prone to indulging in risky sexual behaviours in the transitional phase of life towards adulthood, which makes them susceptible to sexual coercion, violence, and increased vulnerability to STI/HIV/AIDS [6].

In India, almost 23% of women were reportedly married below the legal age. About 23.7% of girls aged 15–19 have had a live birth, the median number of days of the last sexual encounter reported by girls (15–19 years) was 7.7 days, and only about 33.7% of women in the age group 20–24 years (who had two or more partners in the last 12 months) had reported using a condom during sexual encounters, and about 7.7% of ever-married girls aged 18–24 years have reported experiencing sexual violence [7]. Comprehensive knowledge of HIV/AIDS and STIs among AGYW is also limited among adolescents, making them vulnerable to risky sexual behaviour. National Family and Health Survey (NFHS) reports that 22% of young women and 32% of young men aged 15–24 years have comprehensive knowledge of HIV [7]. Furthermore, the risk of HIV among adolescents could be compounded by their incomplete and inaccurate knowledge [8]. A longitudinal study conducted in Uttar Pradesh reveals limited HIV knowledge among unmarried and married older girls (30–37%) as compared to older boys (57%) aged 15–19 years [9].

Global evidence shows AGYW are disproportionately vulnerable to HIV infection due to greater physiological risk, gender inequality, unequal gender norms and gender-based violence, including intimate partner violence and early marriages [10]. However, there is a lack of comprehensive evidence in the Indian context about the vulnerability of the AGYW community towards HIV/STI infection.

Most relevant literature in India has focused on high-risk and key populations such as female sex workers, men who have sex with men and injecting drug users or trafficking victims [11–13]. There has been limited research on adolescent and young populations/non-key populations and their vulnerability to HIV risks. To the best of our knowledge, no other literature reviews are available on this topic except a study protocol published by Patsani et al. [14].

Against such a backdrop, we aimed to conduct a rapid review of the literature on the vulnerability of adolescent girls and young women to STI/HIV infection. We conducted a rapid review for the following broad domains: (i) Spatial distribution or concentration of HIV/STI infection, (ii) awareness, prevalence, and incidence of sexually transmitted infections/HIV, (iii) common determinants of STI, HIV infection and sexual risk behaviours, and (iv) health-seeking behaviour and interventions (and their effectiveness) to prevent/communicate about STIs/HIV and sexual risk behaviours among AGYW in India.

## Methods

We designed the rapid review with guidance from the Cochrane Rapid Review [15] and registered the study with the International Prospective Register of Systematic Reviews (PROSPERO), registration ID: CRD42023403713 (Refer to [S1 Appendix](#)). We attached the detailed

study protocol as a supplementary document (Refer to [S1 File](#)), which we followed while developing the review article. Developing the planned search strategy and selecting search terms and electronic databases was guided by other rapid and systematic reviews and publications on HIV infections among AGYWs [16–23]. We used systematic search strategies in the rapid review, but it is limited to particular aspects to provide a time-sensitive assessment of the available literature [24].

### Literature search strategies and study selection

We searched JSTOR, PubMed, Google Scholar, Science Direct and Population Council Knowledge Commons databases for English language articles, reports, reviews, and research briefs published between January 2000 and March 2023, focusing on adolescent girls and young women (AGYW) in the age group of 15–24. We developed detailed inclusion/ exclusion criteria mentioned in [Table 1](#). We included evaluation studies that used Randomized Control Trials (RCTs), quasi-experimental design (fixed-effects, regression discontinuity, instrumental variables analysis and difference-in-difference analysis), studies that used longitudinal data sets, qualitative studies, and literature review articles. Grey literature, research briefs and peer-reviewed published articles are considered for the review. We excluded the studies that are not focused on India or women, not within the 15–24 age group. We searched articles for key and non-key populations; the key population included AGYW involved with the sex trade or in a same-sex relationship. The non-key population has AGYW, who are not considered the key population.

We finalized the search keywords using a combination of search terms like Adolescent Girls and Young Women, HIV, Sexual and Reproductive Health, Sexual and Reproductive Health Knowledge, Sexual and Reproductive Health Awareness, Sexual and Reproductive Health Risks, Behavioural Interventions, and others. The final search strings are attached as support material (Refer to [S1 Table](#)).

### Data extraction, synthesis, analysis, and quality assessment

Starting from searching keywords to synthesizing the extracted content, we adhered to the guidelines of the Cochrane group [15]. Six researchers (RD, AS, SM, MM, KS, MN) manually and independently surveyed the titles, abstracts, keywords, and full texts of the articles, performed relevancy checks and finalized the list of published articles and grey literature. Minimal data set is included as supporting information (Refer to [S2 Table](#)). They also extracted the data, and two team members (AS and SM) checked for duplicate articles. One team member (SP) independently performed the quality assessment of 50% of the selected papers manually. For all the articles, data is extracted on the year of publication, type of publication (peer-reviewed journal article, report or research brief), target geography, objective or research questions addressed in the article, duration of data collection (if quantitative), study design—quasi-experimental, Randomised Control Trial, Cross-Sectional approaches for quantitative studies, narrative synthesis, descriptive through case studies or In-Depth Interviews (IDIs) or Focus Group Discussions (FGD) for qualitative studies. Additional data included sample size and sampling strategy (random/ stratified/ purposive, convenience), age range and socio-demographic profile of the respondents. Then, we extracted data based on four research questions: spatial distribution or transmission network of STI / HIV /sexual risk behaviour, awareness, prevalence and incidence of STI/ HIV along with outcome measure and effect sizes, prevalence and incidence of sexual risky behaviour, determinants of STI/ HIV, strategies/sources to influence/encourage health-seeking behaviour, intervention strategies to prevent sexual risk behaviour/ STI and HIV, intervention/exposure measures, including frequency of intervention,

**Table 1. Inclusion and exclusion criteria.**

| Criterion                               | Include                                                                                                                            | Exclude                                                                                  |
|-----------------------------------------|------------------------------------------------------------------------------------------------------------------------------------|------------------------------------------------------------------------------------------|
| Language                                | Published in English                                                                                                               | Not in English                                                                           |
| Population                              | Adolescent girls and young women                                                                                                   | Men                                                                                      |
|                                         | 15–24 age group                                                                                                                    | Girls below the age of 15<br>Women more than age 25                                      |
| Spatial distribution                    | India—national-level studies and state-specific studies                                                                            | Other than India                                                                         |
| Knowledge and incidence of STI/ RTI/HIV | Knowledge of STI/RTI/HIV                                                                                                           | Awareness/prevalence/incidence of any disease other than STI/RTI/HIV                     |
|                                         | Prevalence of STI/RTI/HIV                                                                                                          |                                                                                          |
|                                         | Incidence of STI/RTI/HIV                                                                                                           |                                                                                          |
|                                         | Sources of information for STI/RTI/HIV                                                                                             |                                                                                          |
| Determinants of STI/ HIV                | Focusing on determinants of STI/HIV/ sexual risk behaviour at the individual level, community or institution level, societal level | The direction of association between determinants and outcomes not clear or inconclusive |
| Health seeking behaviour                | Formal service providers                                                                                                           | Does not consider any of the providers                                                   |
|                                         | Traditional healthcare providers                                                                                                   |                                                                                          |
|                                         | Informal sources                                                                                                                   |                                                                                          |
|                                         | Prevention programs                                                                                                                |                                                                                          |
|                                         | Participatory training programs                                                                                                    |                                                                                          |
| Interventions                           | Evaluation of single or multiple component interventions compared against appropriate counterfactual                               | Insufficient details on intervention                                                     |
|                                         | Outcomes will include the following -                                                                                              | Evaluation not adequately designed.                                                      |
|                                         | HIV knowledge and prevalence                                                                                                       |                                                                                          |
|                                         | Risky sexual behaviour                                                                                                             |                                                                                          |
|                                         | Forced sex                                                                                                                         |                                                                                          |
|                                         | Self-efficacy/self-negotiation/ Positive gender attitude                                                                           |                                                                                          |
| Timing                                  | Studies conducted between 1st January 2000 to 31st March 2023                                                                      | Studies conducted before 2000 or after March 2023                                        |
| Study design                            | Empirical studies from                                                                                                             | Editorials                                                                               |
|                                         | Randomised Control Trial                                                                                                           | Commentaries                                                                             |
|                                         | Quasi experimental design                                                                                                          | Research Brief                                                                           |
|                                         | Used cross-section or longitudinal data                                                                                            |                                                                                          |
|                                         | Methods used—qualitative/ quantitative/mixed                                                                                       |                                                                                          |
|                                         | Systematic reviews                                                                                                                 |                                                                                          |
|                                         | Published report                                                                                                                   |                                                                                          |
|                                         | Published journal article                                                                                                          |                                                                                          |
|                                         | Grey literature                                                                                                                    |                                                                                          |

<https://doi.org/10.1371/journal.pone.0298038.t001>

intervention components, effects of intervention (with effect sizes). Following the Cochrane guidelines [15], designated reviewers extracted data using a piloted form. Further, other reviewers checked for the correctness and completeness of the extracted data. Data extraction was limited to a set of required data items based on our a priori research questions.

Given the heterogeneity of the study design, we did not conduct any pooled analysis. Instead, we used the narrative synthesis method [25, 26] guided by the review questions. Four coders (AS, RD, SM, MM) coded the text line-by-line in the first step. Then, they derived the descriptive themes following four research questions of HIV/ STI vulnerability of the AGYW community—spatial distribution of HIV/ STI infection, awareness, prevalence and incidence of HIV/ STI infection, determinants of sexual risk behaviour, HIV/ STI infections, health-seeking behaviour or intervention strategies to prevent or communicate about STI/ HIV or sexual risk behaviour and analyzed the review findings accordingly. We also used descriptive statistics, including frequency tables and graphs, to tabulate the distribution of articles across different

outcomes. Approximately one-third of the extracted studies focused on high-risk populations such as men having sex with men (MSM) and transgender and commercial sex workers and assessed their sexual risk behaviour and risk and prevalence of STI/HIV along with health-seeking and intervention strategies. We included the analysis of high-risk populations under each of the four descriptive themes.

We developed Risk of Bias (ROB) assessment tools for this rapid review applicable to qualitative and quantitative studies. Following the Cochrane guidelines for data quality, we conducted a rigorous risk of bias assessment, where we used valid risk of bias tools (separately for qualitative and quantitative studies). The ROB assessment tool for quantitative studies was adapted from the Effective Public Health Practice Project (EPHPP) Quality assessment tool [27]. The ROB assessment tool for qualitative studies was adopted from Consolidated Criteria for Reporting Qualitative Research (COREQ) guidelines [28]. We assessed each article and summarised the findings attached as support materials indicating the overall quality of the articles included in this rapid review. For the ROB assessment of the mixed methods studies, we used the quantitative and qualitative tools for the quantitative and qualitative sections, respectively. Five reviewers (SP, AS, RD, SM and MM) conducted the ROB assessment. The quality of the risk of bias assessment exercise is ensured by another team member, SR, independently by randomly checking approximately 15% of the total studies. Discrepancies were resolved to attain high inter-rater reliability. We also have limited the risk of bias ratings to the most important outcomes, with a focus on those most important for decision-making. The authors were in continuous discussions with experts from the funding agency, and the reviews received at each stage were incorporated adequately throughout the process of the rapid review.

## Results

Of 242 records screened, 96 articles met our inclusion criteria. These studies were conducted either across India or focused on specific states, including Maharashtra, Rajasthan, Jharkhand, Haryana, Karnataka, Gujarat, Punjab, Andhra Pradesh, Bihar, Tamil Nadu, Himachal Pradesh, Mizoram, Uttar Pradesh, Kerala, and Delhi. They included quantitative ( $n = 68$ ), qualitative ( $n = 20$ ) and mixed method ( $n = 6$ ) study designs. Furthermore, we had two articles that focused on reviews of conceptual or implementation frameworks. Of the included studies, 3 reported spatial distribution of HIV/ STI infection, 23 on awareness/ prevalence/ incidence of risky sexual behaviour or HIV/ STI, and 22 mentioned the determinants of HIV/ STI/ sexual risk behaviour. At the same time, 27 dealt with help-seeking behaviour or intervention strategies to prevent HIV/ STI. While the rest 21 studies overlap across different research questions. We reported the distribution of studies across four research questions in [Table 2](#).

**Table 2. Distribution of studies across four research questions.**

| Research question  | Number of articles |
|--------------------|--------------------|
| RQ1                | 3                  |
| RQ2                | 23                 |
| RQ3                | 22                 |
| RQ4                | 27                 |
| RQ1, RQ2           | 5                  |
| RQ1, RQ3           | 1                  |
| RQ2, RQ3           | 10                 |
| RQ2, RQ4           | 2                  |
| RQ3, RQ4           | 2                  |
| RQ1, RQ2, RQ3      | 1                  |
| <b>Grand Total</b> | <b>96</b>          |

<https://doi.org/10.1371/journal.pone.0298038.t002>

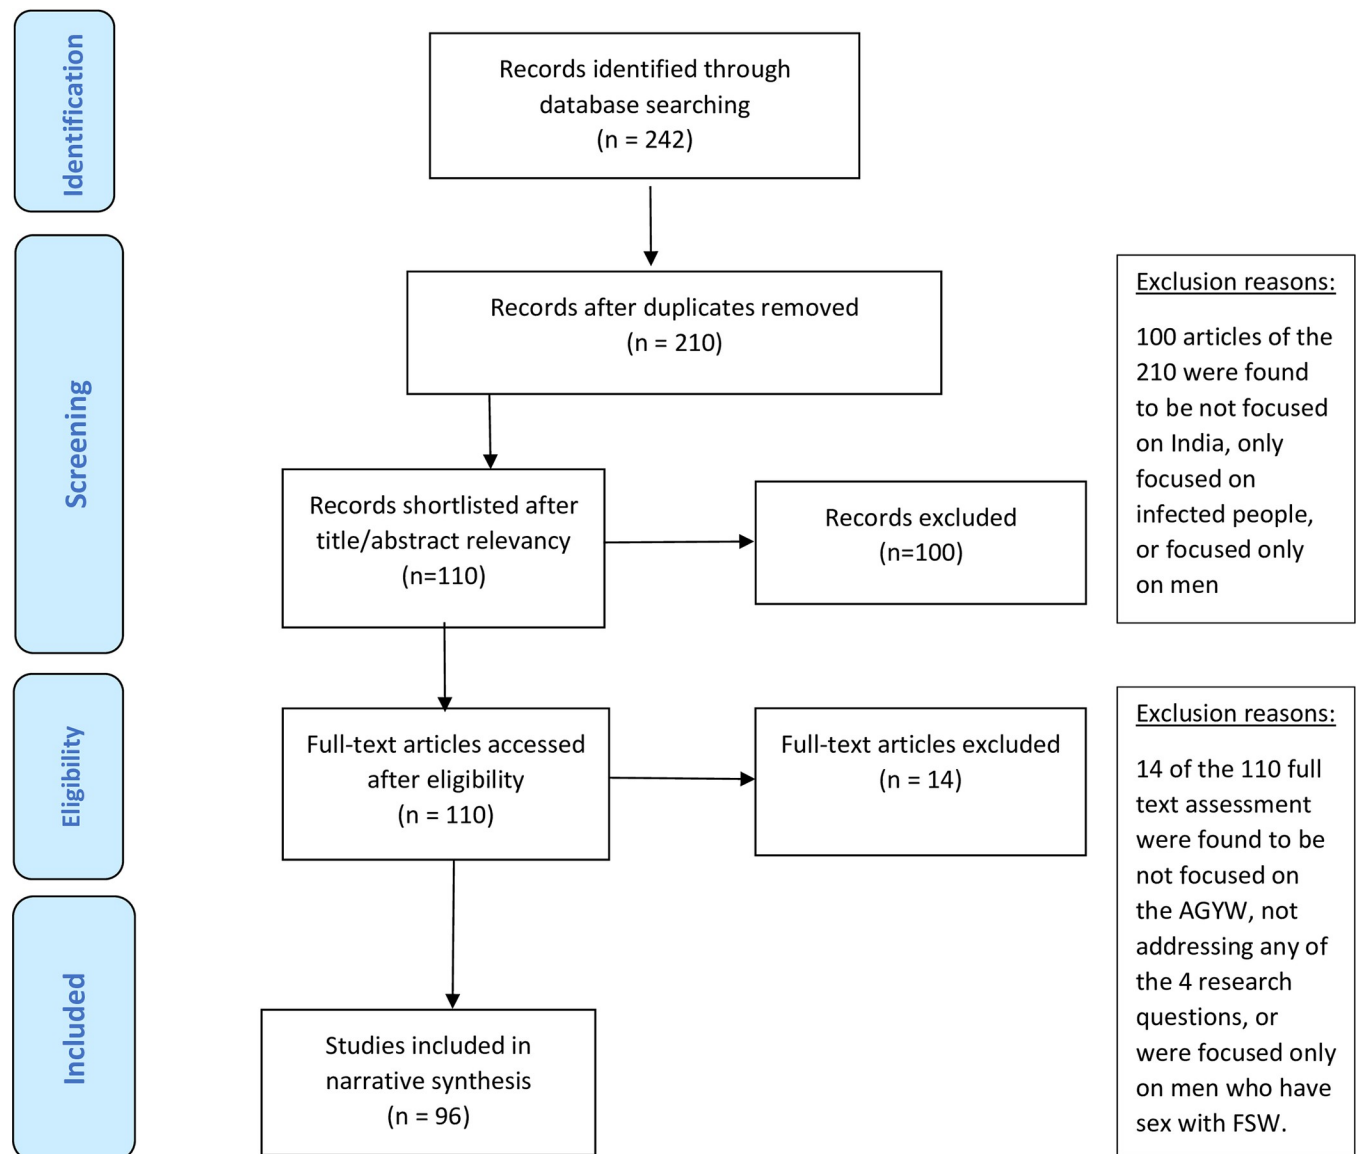

**Fig 1. PRISMA flow diagram for journal articles.**

<https://doi.org/10.1371/journal.pone.0298038.g001>

Following the PRISMA flow diagram, we reported the distribution of included articles, reports, and grey literature in Fig 1. We also added PRISMA checklist for abstract (Refer to [S1 Checklist](#)) and PRISMA checklist for main manuscript (Refer to [S2 Checklist](#)) as the supporting information.

### Spatial distribution of risky sexual behaviour / HIV/ STI vulnerability and prevalence

Nine studies identified districts/states or regions with a high prevalence of HIV infection or premarital sex among the AGYW community. Following the literature, we reported the transmission network of high premarital sex and HIV prevalence among key and non-key populations in [Table 3](#).



**Table 3. Spatial distribution of HIV prevalence and premarital sex.**

| Focus                                                     | Region                                                                                                                                                                                                                                                                     |
|-----------------------------------------------------------|----------------------------------------------------------------------------------------------------------------------------------------------------------------------------------------------------------------------------------------------------------------------------|
| High premarital sex                                       | Central India; North India; Manipur; Nagaland; Gujarat; Uttar Pradesh; Jharkhand                                                                                                                                                                                           |
| High HIV prevalence                                       | Among general population: South India; Northeast India; Southeastern coastal zone of Andhra Pradesh, Odisha, Karnataka<br>Among FSWs: The western part of central India, including Gujarat, and parts of Rajasthan, Madhya Pradesh, and Maharashtra are high-risk regions. |
| Risk of HIV transmission among injecting drug users (IDU) | Mizoram                                                                                                                                                                                                                                                                    |
| A higher number of trafficked girls                       | Karnataka; Maharashtra                                                                                                                                                                                                                                                     |

<https://doi.org/10.1371/journal.pone.0298038.t003>

Ten percent of districts, mainly in south and northeast India, observed a consistently high prevalence of HIV [29]. Prevalence of premarital sex is relatively higher in the central region of India (24% male and 5% female), followed by the northern part (19% male and 4% female). On the other hand, the prevalence of premarital sex among unmarried men and women was the lowest in the southern region. Prevalence of premarital sex is higher in Manipur (5%) and Nagaland (12%), Gujarat (3.5%), Uttar Pradesh (4.3%) and Jharkhand (3.4%) [30].

One study mentioned that the southeastern coastal zone of Andhra Pradesh is one of the vulnerable areas for HIV infection, where women are involved with the sex trade and injecting drug use [31]. Indian women and girls trafficked from the states of Karnataka and Maharashtra were more likely to test positive for HIV than those trafficked from other Indian states ( $P = 0.003$ ).

One article [32] found that Mizoram in northeastern India observed the highest risk of HIV transmission among injecting drug users (IDU) (19.8% among IDU), followed by Manipur. Meghalaya has the lowest vulnerability [32].

### Awareness/ prevalence/ incidence of sexual risk behaviour/ HIV/ STI

Thirty-seven articles discuss awareness, prevalence and incidence of HIV/ STI/ sexual risk behaviour, prevalence, and incidence. Ten out of 37 articles focused on adolescent girls and young women, while the rest considered women in the reproductive age group (15–49) as the study sample. These studies were conducted in Delhi [33, 34], Maharashtra, Gujarat [35], Uttar Pradesh [36], Bihar [37] Punjab [38], Tamil Nadu [39] using primary data. At the same time, Tripathy [40] used DLHS data at the all-India level for this age group to analyze the awareness about sexual and reproductive needs. We presented the distribution of articles focusing on research question 2 in Table 4.

**Table 4. Distribution of articles—awareness/ prevalence/ incidence of sexual risk behaviour/ STI/HIV.**

| Study Focus | No. of articles                                 |    |
|-------------|-------------------------------------------------|----|
| Awareness   | Knowledge about HIV/STI (ever heard of STI/HIV) | 16 |
|             | Knowledge about STI/HIV transmission pathways   | 20 |
|             | Sources of information                          | 11 |
|             | Contraception                                   | 10 |
| Prevalence  | STI                                             | 9  |
|             | HIV                                             | 13 |
| Incidence   | STI                                             | 1  |
|             | HIV                                             | 1  |

<https://doi.org/10.1371/journal.pone.0298038.t004>

Most of the articles mentioned that the AGYW community had limited knowledge about the transmission of HIV or its cure. Knowledge about STIs other than HIV (Genital Herpes, Gonorrhoea or Syphilis) is even more limited. A few studies mentioned that a proportion of respondent girls are aware of transmission pathways of HIV through sexual practices with multiple partners, unsafe sex with partners and sex workers, transmission through blood transfusion or sharing of needles/syringes, and transmission from infected mother to child [33–35, 38–41]. One study stated that economic status, education, locality of residence (urban/rural), and caste are significant determinants of SRH knowledge [37]. As pointed out by [39], Of the respondents, 75% were aware of HIV/AIDS, but 39% and 19% only knew the mode of transmission and prevention of HIV infection, respectively.

Very few studies provided statistics on dating or premarital sex among AGYW. A small proportion of unmarried adolescent girls in a study from Delhi reported that they are dating (3% of 313) or are sexually active (4% of 313) [42]. Jain et al. [43] found that the mean sexual debut age is 17, and consensual sexual activity started early. Partners of the girl respondents took more initiative to form emotional (64%) and physical relationships (78%).

Eleven studies considered the prevalence or incidence of STI/HIV among the AGYW community as outcome measures [39, 44, 45]. One of these three studies [39] identified the prevalence of any symptom suggestive of Reproductive Tract Infection (RTI) or Urinary Tract Infection (UTI) among 52% of the respondents. Chandrashekarappa et al. [45] found that 7% of the respondents (pregnant mothers) were diagnosed with herpes simplex virus type 2 antibodies, 0.40% and 0.12% suffered from hepatitis B and syphilis. Fifty percent of children of HIV-infected mothers were found to be HIV-negative. One study from Meghalaya pointed out that 64% of 250 young female respondents suffered from STI symptoms like lower abdominal pain, itching in the genital area and burning micturition [44].

The average age of HIV infection is 16 years among sex trafficking victims [46]. In Karnataka, migrated female sex workers are more likely to practice safe sex under the protection of institutional set-up and less vulnerable to HIV compared to mobile or street-based FSWs based in brothels [47]. One study focusing on injecting drug users [48] from northeast India showed that HIV seropositivity is high among the respondents who share their drug-injecting syringes. Over three-quarters ( $n = 48$ ) of sex-trafficked women and girls were tested for HIV; Sex trafficked women and girls lack autonomy and are rendered vulnerable to HIV infection through several means [49].

Three out of 37 studies discussed the sources of information about HIV/STI transmission or cure, which may be informal or formal sources. Informal sources include peers and friends, while formal sources include schools [33], television, newspapers, and posters at the local health clinic [34, 41].

### **Determinants of risky sexual behaviour/ HIV/ STI**

Thirty-six studies reported common determinants of STI/HIV infections and sexual risk behaviours for AGYW. Some of the studies considered the age range of the respondents as 12–30 [38, 39, 42–44, 49–54]. The rest of the studies included the AGYW community as a part of the study participants comprising women of reproductive age (15–49).

Out of 36 studies, 21 are quantitative, 10 are qualitative, 4 discuss the descriptions of health profiles of AGYW, risky behaviours, and diverse characteristics of FSWs, and 1 is a review article. Quantitative techniques are applied to the cross-sectional survey data; descriptive analysis, multiple regression analysis or path analysis are generally used for analytical purposes.

A review article discussed that the determinants of vulnerability to HIV include individual factors, school, family and societal factors, and emotional and social influencers [54].



Significant determinants of sexual resilience that are the time taken before sexual debut include attitude towards premarital sex (0.638), self-esteem (0.528), and partner pressure (-0.482). Girls usually experience more parental monitoring (0.315) and are more likely to have higher self-efficacy to refuse sex (0.333). A significant predictor of vaginal intercourse for males is peer norms regarding sex (0.154) along with preparatory behaviour (0.324) [53]. Qualitative studies also mentioned that young women have poor sexual negotiation power with their partners, which may lead to unsafe sexual activities and exposure to HIV/STI [50]. AGYW community often cannot resist unsafe sex or end an oppressive relationship due to a lack of resilience. They accept unsafe sex to retain partners and suffer from consequences. However, the correlation of sexual resilience with age, family income, education and knowledge is insignificant. One study mentioned that lack of sexual resilience in highly vulnerable areas is one of the critical determinants of unwanted pregnancies, sexually transmitted diseases, HIV/AIDS or cervical cancer [43].

There is a significant association between the nuclear status of a family and preference for premarital sex [38]. Education and economic status are significant determinants of pre and extramarital sex of married men. Interestingly, the husband's having had premarital sex was directly and positively associated with having had extramarital sex in the past year (0.64,  $p < .001$ ) [44]. Singh et al. [30] found that the use of condoms is high at first premarital sex among educated men and women in urban areas using the fourth round of National Family Health Survey data.

Awareness of HIV is one of the significant factors (adjusted OR 4.1, 95% CI 1.03–16.3) in using condoms in marital sex [44]. Women's autonomy, knowledge, and awareness about HIV, along with age, education, and economic status, are significant determinants of condom use or safe sex practices in Kerala and Uttar Pradesh [55]. Age and education also play essential roles in HIV transmission [56, 57]. Uneducated women had 2.3 times more risk of HIV infection compared with women with some education (95% CI 1.5–3.6;  $P < 0.001$ ), as mentioned in a study focusing on the private health care sector in Puna [57].

A study among discordant couples registered in an ART centre in Karnataka found that 38% of the total sample ( $n = 925$ ) did not use condoms, and transmission of infection was mainly through blood [58]. Sex workers face a high risk of HIV since male clients are not willing to use protection [49] and have low negotiation power due to fear of violence [59]. Economic insecurity and debt in this community also lead to forced and unprotected sex, which becomes an important determinant of HIV risk [51].

## Health-seeking behaviour and interventions to prevent STI/HIV

Fifteen studies addressed health-seeking behaviour. Age, caste, level of education, wealth status and exposure to marital violence are important determinants of health-seeking behaviour. Among respondents who had experienced symptoms of RTIs, 57% of married and 66% of unmarried women had not sought treatment. Two-fifths of married women had sought treatment from formal medical providers (11% from the public sector and 28% from the private sector), and one-third of unmarried women (10% and 20%, respectively). Only 3–4% of either group had relied on traditional healthcare providers or home remedies [60].

Twenty-five studies discussed intervention on HIV/STI awareness and analyzed whether sexual practises or HIV/STI prevalence changed with improved awareness post-intervention. Of 25 intervention studies, eight focused on intervention for female sex workers, two targeted injectable drug users and alcoholics and 1 targeted pregnant women. One study discussed the providers' perspective on adolescent-friendly health services [61]. We found one study which examined the correlates of health-seeking behaviour [61]. About ten were single intervention

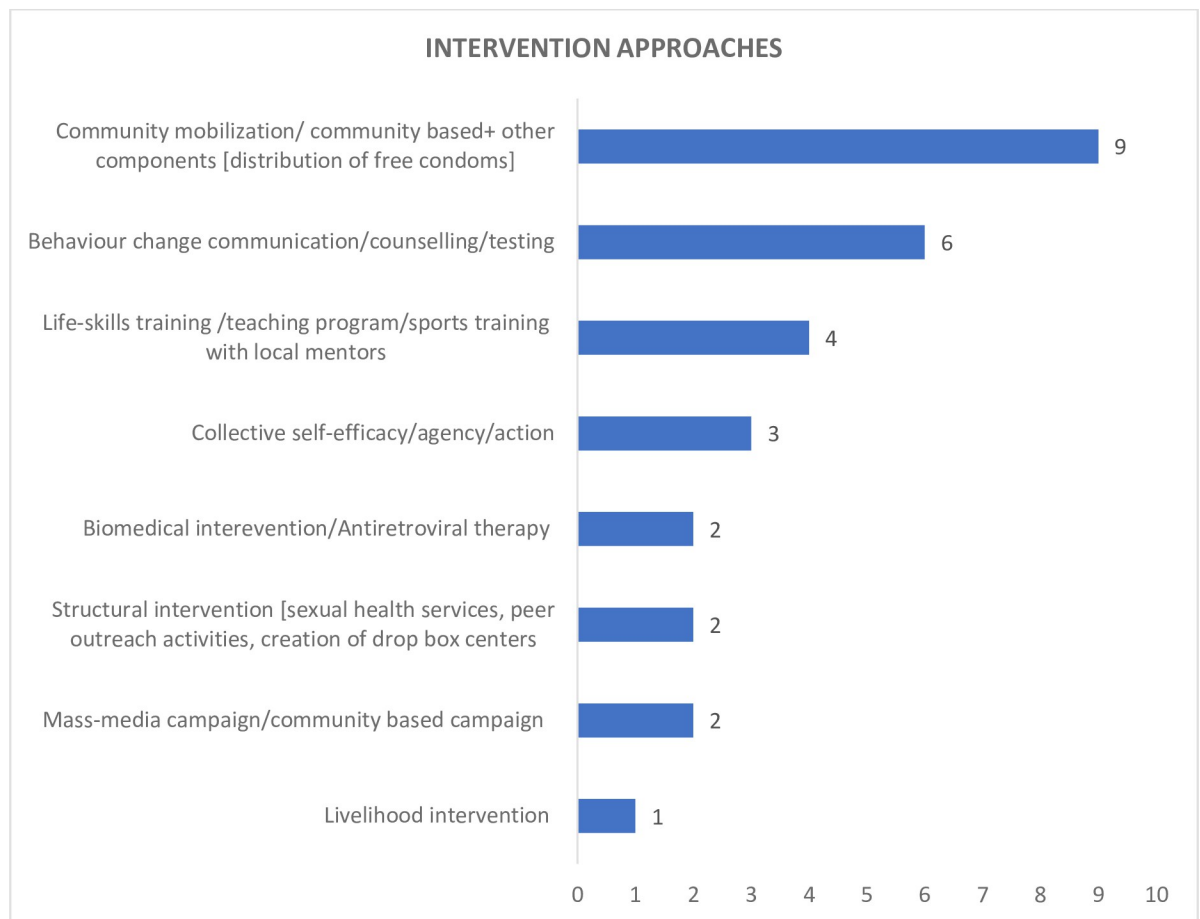

**Fig 2. Distribution of studies across different intervention approaches.**

<https://doi.org/10.1371/journal.pone.0298038.g002>

studies, while the remaining 15 were multiple component intervention studies. Eleven studies used qualitative data to mention the intervention approaches in protocols and frameworks. The distribution of studies across different intervention approaches is presented in Fig 2.

Most youth and unmarried women respondents from the District Level Household Survey expressed the importance of family life education to improve knowledge of Sexual risk behaviour, HIV and STI. The primary sources of such education include teachers, educational institutes, family members, including elder sisters or sisters-in-law, friends, and peers [62]. The community-based campaign is one of the significant determinants of HIV testing facility awareness [63]. Mass media campaigns increased HIV knowledge (22.8%) and decreased perceived risk [64]. School-based intervention programs in Himachal Pradesh reduced risk-taking behaviour among adolescent school children [65]. The intervention improved knowledge about STI transmission (85% of cases) and HIV prevention (77.5%) among non-infected women in Mumbai [66]. HIV counselling sessions helped decrease HIV prevalence among pregnant mothers attending an antenatal care clinic in Puna [57]. We reported the association between intervention strategies and primary outcomes, including risk-taking behaviour, HIV prevalence and knowledge, self-efficacy, condom use, etc., in Table 5.

**Table 5. Intervention strategies—What worked?**

| Intervention strategies [n = number of articles]                                                                                                                         | Primary outcomes [positive or negative effects] |
|--------------------------------------------------------------------------------------------------------------------------------------------------------------------------|-------------------------------------------------|
| Mass-media campaigns +Teaching Program+ Behaviour change communication/counseling+ training on communication/ relationship skills [n = 4]                                | HIV knowledge [+]                               |
| Distribution of free condoms+ community mobilization+ structural interventions+ counseling+training on communication/ relationship skills + mass-media campaigns [n = 8] | Condom use [+]                                  |
| Collective self-efficacy + Life-skills training [n = 3]                                                                                                                  | Self-efficacy [+]                               |
| Community based model+ medical and referral services +community based HIV campaign +HIV testing program [2]                                                              | HIV counselling and testing services [+]        |
| Community mobilization+ life-skills training+ structural intervention [n = 4]                                                                                            | HIV prevalence [-]                              |
| Life-skills training [n = 1]                                                                                                                                             | Risk-taking behaviour [-]                       |
| Mass-media campaign+ training on communication + relationship skills [n = 2]                                                                                             | Positive gender attitudes [+]                   |
| Mass-media campaigns+ training on communication + relationship skills + life skills training [n = 3]                                                                     | Inter-personal communication [+]                |
| Community mobilization [n = 1]                                                                                                                                           | HIV-positive cases [-]                          |
| Community mobilization +structural interventions [n = 2]                                                                                                                 | STI cases [-]                                   |
| Community self-efficacy [n = 1]                                                                                                                                          | Self-negotiation [+]                            |
| Training on communication + relationship skills [n = 2]                                                                                                                  | Forced sex [-]                                  |
| Structural intervention [n = 1]                                                                                                                                          | Sex work [-]                                    |

<https://doi.org/10.1371/journal.pone.0298038.t005>

The factors influencing HIV service uptake for female sex workers were awareness about HIV risk and consequences, fear of exposure to family, friends, and peers about involvement with the sex trade, quality of care in the available services, confidentiality issues in accessing services, accessibility to services including long distance, charges of public services [11]. Formal education, family counselling, peer-based behavioural rehabilitation, and state-specific intervention strategies could reduce HIV transmission among IDUs in northeastern states [32]. One study from Manipur and Nagaland found that a comprehensive, integrated women's health centre is more likely to attract women drug and alcohol users than the current HIV prevention services or existing government health services [12]. Prevention programmes targeted to Female Sex Workers (FSW) in Karnataka have successfully reduced risky behaviours, STIs, and HIV [52]. Utilization of HIV counselling services increased awareness about HIV and decreased STI incidence significantly among FSWs [67]. Evaluation of the Aastha program aimed to develop collective self-efficacy to prevent HIV/ STI, indicating that improved collective self-efficacy among the program participants helped increase negotiation power among FSWs. They could turn away clients unwilling to use condoms [68]. Evaluation of the Alliance intervention in Andhra Pradesh found that Sex workers with a high degree compared with a low degree of overall collectivization were significantly more likely to report high self-efficacy to use government health facilities (75.0% vs 57.3%, adjusted OR 2.5, 95% CI 2.0 to 3.1) and to use government health centres for STI treatment in past one year (78.1% vs 63.2%, adjusted OR 2.1, 95% CI 1.6 to 2.8), irrespective of a project partnership with government centres [69].

Three studies discussed the evaluation framework [70], monitoring tool [71] and impact [72] of a flagship HIV prevention program, the AVAHAN model of community mobilization for core population groups in four states—Maharashtra, Tamil Nadu, Karnataka, and Andhra Pradesh. There is a positive impact of the program suggesting that HIV prevalence declined significantly from 17.0% to 14.2% ( $P < 0.001$ ) from 2005–2006 to 2008–2009, pre- to post-intervention [72].

## Quality assessment of published studies

Most of the included quantitative studies have reported high selection bias (Refer to [S3 Table](#)). More than half of the quantitative studies reported risk of any other bias, including social desirability bias, non-response bias, recall bias or selection bias. The study samples did not represent the target population in approximately one-fourth of the included studies. However, the sample size was adequate in more than 90% of studies. Almost none of the studies reported the reliability and validity of the data tools. More than two-thirds of the studies reported confidence intervals, standard errors, or p-values in reporting their results, indicating robust reporting of results—however, none of the quantitative studies satisfied all the ROB assessment criteria. We could not conduct a meta-analysis because of study design and outcomes heterogeneity.

Half of the included qualitative studies either did not describe the methodology, did not report the underlying theory, or both (Refer to [S4 Table](#)). Furthermore, several studies did not straightforwardly elaborate on data collection settings. Approximately two-thirds of the studies did not mention any non-participation or dropout rates. Very few studies reported interview guides or field notes. Only one-third of the studies described coding trees or reported on the number of data coders. None of the included studies conducted participant checking, implying inadequate information on the qualitative data analysis. It is to be noted that five articles were excluded from the ROB assessment as they were poster presentations, abstracts, conceptual frameworks, or review articles, thereby limiting our opportunity to assess them constrained by the standard assessment tools.

## Discussion and conclusion

We identified 96 peer-reviewed studies that addressed transmission network or geographical concentration of sexual risk behaviour and STI/HIV infection (RQ1), awareness, prevalence, and incidence of STI / HIV (RQ2), determinants of sexual risk behaviour, STI/ HIV (RQ3), and health-seeking behaviour and intervention mechanisms to address STI/ HIV (RQ4) among AGYW community in the Indian context. Of these, 3, 23, 22 and 27 studies focused exclusively on RQ1, RQ2, RQ3 and RQ4, respectively. A few studies addressed more than one research objective. Studies used quantitative, qualitative, and mixed methods to analyze the research questions.

A high-quality systematic review would be ideal for addressing the research questions in this context. However, we attempted to conduct a rigorous rapid review given the time and resource constraints. The other limitations of the study are the following. We considered the documents published only in English within a specific time (2000–2023). We also did not conduct a meta-analysis due to the heterogeneity of study findings.

Limited evidence was available on the transmission network or high concentration areas for HIV/STI infection among the AGYW community in India. Studies pointed out low awareness about sexual risk behaviour/ STI/ HIV, and the prevalence and incidence of STI/ HIV are also low. However, the FSWs, IDUs, and human traffic victims suffer more. Prevalence of STI/ RTI ranged from 11–17% in Andhra Pradesh, Maharashtra, Rajasthan and Jharkhand to 21–22% in Bihar and Tamil Nadu among the study participants [60]. The overall prevalence of HIV infection among the general population in India was reportedly 0.24% (95% CI: 0.21%–0.28%) [73].

Key determinants influencing sexual risk behaviours and the vulnerability of AGYW to STIs and HIV are primarily rooted in socioeconomic contexts, relationship dynamics, proximal factors, substance use, and awareness levels about STIs/HIV [30, 39, 44, 56, 73–79]. Socioeconomic factors such as age, educational attainment, marital status, economic status, and

overall living conditions significantly dictate the vulnerability of AGYW to these health risks [4, 10]. Notably, younger individuals with lower educational backgrounds and those living in impoverished conditions are at heightened risk due to restricted access to relevant information and healthcare resources [2, 10]. The marital status of AGYW further influences their risk, with unmarried or younger married women often being more vulnerable due to reduced sexual autonomy and limited ability to negotiate within sexual relationships [9].

Furthermore, the power dynamics within partner relationships, including the age and educational background of the partner, play a pivotal role in determining the vulnerability of STI/HIV [10]. Power imbalances and the lack of negotiating capacity for safer sexual practices, such as consistent condom use, amplify these risks [10]. Proximal risk factors like early marriage, premature sexual initiation, and trafficking also constitute significant risk determinants. Such behaviours are often observed in environments where comprehensive sexual health education is absent, leading to risk-prone sexual behaviours [3, 10].

The consumption of substances and alcohol has been linked to risky sexual behaviours, including unprotected sex and having multiple sexual partners, thereby escalating the risk of STI/HIV transmission [12]. Awareness and knowledge about STIs and HIV are also crucial in shaping sexual behaviours. A lack of awareness, particularly prevalent in low-income settings, increases vulnerability [7, 33]. Misconceptions and misinformation about HIV/STIs compound this vulnerability [33].

These interrelated determinants highlight the complexity of vulnerability among AGYW, underscoring the need for multi-pronged intervention strategies. It is essential to implement educational initiatives, foster community engagement, and provide healthcare services that are specifically tailored to the needs of AGYW to mitigate these risks and reduce the prevalence of STIs and HIV [2, 9, 10].

Fifteen studies have delved into this area, revealing that factors such as age, caste, education level, economic status, and exposure to marital violence significantly influence these behaviours. Notably, AGYW tends to rely more on traditional sources for health information and advice, such as mothers, other female family members, friends, peers, and neighbours, rather than formal healthcare sources like public and private health facilities, STI clinics, or drop-in centres [7, 9]. This preference for informal sources may be attributed to accessibility, perceived confidentiality, and cultural norms surrounding sexual health [33].

In addition to understanding health-seeking behaviours, twenty-five studies have evaluated the impact of single or multiple-component interventions on various outcomes related to HIV knowledge, prevalence, and sexual risk-taking behaviours among AGYW. These interventions range from mass media campaigns and community mobilization efforts to structural interventions and life skills training [2, 10]. These strategies have been found effective in enhancing HIV-related knowledge, increasing condom usage, and improving self-efficacy in sexual health decisions among AGYW. For instance, by leveraging platforms like television, radio, and social media, mass media campaigns have been instrumental in disseminating crucial information about HIV prevention and safe sexual practices [12].

Community mobilization initiatives, which involve grassroots-level engagement and empowerment, have been shown to foster a supportive environment for AGYW to discuss and address sexual health issues. These initiatives also contribute to reducing the stigma associated with HIV and promoting healthy sexual behaviours [68, 71]. Structural interventions, which address broader socioeconomic factors influencing health behaviours, have been impactful in creating safer environments for AGYW, thereby reducing their vulnerability to STIs and HIV [10, 80].

Life skills training, which focuses on imparting knowledge about sexual health, negotiation skills, and decision-making, could be effective in equipping AGYW with the tools to navigate complex social and relational dynamics that influence their sexual health. These interventions

highlight the importance of comprehensive and holistic policies in tackling these public health challenges by addressing the multifaceted nature of AGYW's vulnerability to HIV and STIs.

## Conclusion

Despite significant government and NGO initiatives spanning the last two decades aimed at preventing HIV and STIs, both global and national data underscore the high vulnerability to these diseases among AGYW worldwide, including in India. Reports from surveillance and research in India have pinpointed adolescents, particularly girls, as an emerging high-risk and susceptible demographic. It is, therefore, imperative to document the prevalence, underlying factors, and healthcare-seeking patterns of AGYW concerning HIV/STIs at this juncture. This comprehensive rapid review offers valuable insights into the prevalence and diverse socio-economic and geographic determinants of HIV/STI vulnerability among AGYW in India. This information can serve as a valuable resource for shaping and implementing effective policies geared towards preventing HIV/STIs in this population while also encouraging safe sexual practices and promoting positive health-seeking behaviours among AGYW in India.

In conclusion, our study warrants the implementation of appropriate gender (and age)-based culturally sensitive approaches to cope with the increasing vulnerability of young adults, especially girls, towards STIs/HIV in India. Future research may focus on identifying the transmission network or geographical concentration of the vulnerability of sexual risk behaviour/STI/HIV infection among the AGYW in India, which would help effectively implement interventions. It would be beneficial to have detailed mixed-method studies to understand the sexual risk behaviour patterns of this vulnerable age group.

## Supporting information

**S1 Checklist. PRISMA 2020 for abstracts checklist.**

(DOC)

**S2 Checklist. PRISMA 2020 checklist.**

(DOCX)

**S1 Appendix.**

(PDF)

**S1 File.**

(DOCX)

**S1 Table. Final search strings.**

(DOCX)

**S2 Table. Summary of findings from all included studies in the rapid review.**

(XLSX)

**S3 Table. Quality assesment tool for quantitative studies.**

(XLSX)

**S4 Table. Quality assesment tool for qualitative studies.**

(XLSX)

## Acknowledgments

We thank Dr Constanza Gonzalez Parrao and two anonymous referees, Mr Suraj Musa Inuwa and Dr Abubakar Nasiru Galadima, for their valuable input.



## Author Contributions

**Conceptualization:** Sohini Paul, Anupam Sharma, Radhika Dayal.

**Data curation:** Sohini Paul, Anupam Sharma, Radhika Dayal, Mahika Mehta, Sudeshna Maitra, Kuhika Seth, Monal Nagrath, Sowmya Ramesh.

**Formal analysis:** Sohini Paul, Anupam Sharma, Radhika Dayal, Mahika Mehta, Sudeshna Maitra, Kuhika Seth, Monal Nagrath, Sowmya Ramesh.

**Funding acquisition:** Sohini Paul, Sowmya Ramesh, Niranjana Saggurti.

**Investigation:** Sohini Paul, Anupam Sharma.

**Methodology:** Sohini Paul, Anupam Sharma, Radhika Dayal, Mahika Mehta, Sudeshna Maitra, Kuhika Seth, Monal Nagrath, Sowmya Ramesh.

**Project administration:** Sohini Paul.

**Resources:** Sohini Paul, Anupam Sharma, Radhika Dayal, Mahika Mehta, Monal Nagrath.

**Software:** Anupam Sharma, Radhika Dayal, Mahika Mehta, Sudeshna Maitra.

**Supervision:** Sohini Paul.

**Validation:** Sohini Paul, Anupam Sharma, Radhika Dayal, Mahika Mehta, Sudeshna Maitra, Kuhika Seth, Monal Nagrath, Sowmya Ramesh.

**Visualization:** Sohini Paul.

**Writing – original draft:** Sohini Paul, Radhika Dayal.

**Writing – review & editing:** Sohini Paul, Anupam Sharma, Niranjana Saggurti.

## References

1. Global HIV & AIDS statistics—Fact sheet | UNAIDS [Internet]. [cited 2023 Dec 3]. Available from: <https://www.unaids.org/en/resources/fact-sheet#>
2. AIDS Control Organization N. National AIDS Control Organisation | ICMR-National Institute of Medical Statistics, Ministry of Health & Family Welfare, Government of India.
3. Desai VK, Kosambiya JK, Thakor HG, Umrigar DD, Khandwala BR, Bhuyan KK. Prevalence of sexually transmitted infections and performance of STI syndromes against aetiological diagnosis, in female sex workers of red light area in Surat, India. *Sex Transm Infect.* 2003; 79(2). <https://doi.org/10.1136/sti.79.2.111> PMID: 12690130
4. HIV Statistics—Global and Regional Trends—UNICEF DATA [Internet]. [cited 2023 Dec 3]. Available from: <https://data.unicef.org/topic/hivaids/global-regional-trends/>
5. HIV and AIDS [Internet]. [cited 2023 Dec 3]. Available from: <https://www.who.int/news-room/fact-sheets/detail/hiv-aids>
6. Kurapati S, Vajpayee M, Raina M, Vishnubhatla S. Adolescents Living with HIV: An Indian Profile. *AIDS Res Treat.* 2012 Jun; 2012:576149. <https://doi.org/10.1155/2012/576149> PMID: 22778924
7. NFHS 5. International Institute for Population Sciences (IIPS) and ICF. National Family Health Survey (NFHS-5): India. Mumbai. International Institute for Population Sciences. 2021;
8. Narain JP, Jha A, Lal S, Salunke S. Risk factors for HIV transmission in India. *AIDS.* 1994; 8(SUPPL. 2). PMID: 7857571
9. Santhya KG, Gupta AK, Rampal S, Acharya R, Pandey N, Santosh K, et al. Executive Summary: Understanding the lives of adolescents and young adults (UDAYA) in Uttar Pradesh, India (2015–16). Poverty, Gender, and Youth [Internet]. 2017 Jan 1 [cited 2023 Dec 3];2015–31. Available from: [https://knowledgecommons.popcouncil.org/departments\\_sbsr-pgy/512](https://knowledgecommons.popcouncil.org/departments_sbsr-pgy/512)
10. Krishnan S, Dunbar MS, Minnis AM, Medlin CA, Gerdtz CE, Padian NS. Poverty, Gender Inequities, and Women's Risk of Human Immunodeficiency Virus/AIDS. *Ann N Y Acad Sci* [Internet]. 2008 [cited 2023 Dec 3]; 1136:101. Available from: /pmc/articles/PMC2587136/ <https://doi.org/10.1196/annals.1425.013> PMID: 17954681

11. Beattie TSH, Bhattacharjee P, Suresh M, Isac S, Ramesh BM, Moses S. Personal, interpersonal and structural challenges to accessing HIV testing, treatment and care services among female sex workers, men who have sex with men and transgenders in Karnataka state, South India. *J Epidemiol Community Health* (1978). 2012; 66 Suppl 2. <https://doi.org/10.1136/jech-2011-200475> PMID: 22495772
12. Kermodé M, Songput CH, Sono CZ, Jamir TN, Devine A. Meeting the needs of women who use drugs and alcohol in North-East India—A challenge for HIV prevention services. *BMC Public Health*. 2012; 12 (1). <https://doi.org/10.1186/1471-2458-12-825> PMID: 23013114
13. Buzdugan R, Halli SS, Hiremath JM, Jayanna K, Raghavendra T, Moses S, et al. The Female Sex Work Industry in a District of India in the Context of HIV Prevention. *AIDS Res Treat*. 2012 Dec; 2012:371482. <https://doi.org/10.1155/2012/371482> PMID: 23346389
14. Patsani P, Parida J, Panda A, Jena S, Behera SS, Pradhan A, et al. Knowledge, beliefs and practices towards HIV/AIDS among adolescents in India: A scoping review protocol. *PLoS One* [Internet]. 2023 Feb 1 [cited 2023 Dec 3]; 18(2):e0280985. Available from: <https://journals.plos.org/plosone/article?id=10.1371/journal.pone.0280985> PMID: 36787320
15. Garritty C, Gartlehner G, Nussbaumer-Streit B, King VJ, Hamel C, Kamel C, et al. Cochrane Rapid Reviews Methods Group offers evidence-informed guidance to conduct rapid reviews. *J Clin Epidemiol* [Internet]. 2021 Feb 1 [cited 2023 Dec 3]; 130:13–22. Available from: <https://pubmed.ncbi.nlm.nih.gov/33068715/> <https://doi.org/10.1016/j.jclinepi.2020.10.007> PMID: 33068715
16. Brahme R, Godbole S, Sonawale S, Declining Trends in HIV Prevalence Among Women Attending Antenatal Care Clinics Obfuscate the Continued Vulnerability of Adolescent Girls in Maharashtra, India *Journal of Acquir Immune Defic Syndr* [Internet]. 2019; Available from: [https://journals.lww.com/jaids/Fulltext/2019/09010/Declining\\_Trends\\_in\\_HIV\\_Prevalence\\_Among\\_Women.18.aspx](https://journals.lww.com/jaids/Fulltext/2019/09010/Declining_Trends_in_HIV_Prevalence_Among_Women.18.aspx)
17. Budukh A, Maheshwari A, Palayekar V, Bagal S, Purwar P, Deodhar K, et al. Prevalence and nonsexual transmission of human papilloma virus (HPV) in the adolescent girls from rural area of Maharashtra state, India. *Indian J Cancer*. 2018; 55(4).
18. Devarayasamudram S, Gagne JC De, Effectiveness of a Structured teaching program on knowledge and attitudes toward hiv among young women in india. *Journal of Community Health Nurs* [Internet]. 2018; Available from: <https://www.tandfonline.com/doi/abs/10.1080/07370016.2018.1446632>
19. Jejeebhoy SJ, Santhya KG, Acharya R. Physical and sexual violence and symptoms of gynaecological morbidity among married young women in India. *Glob Public Health*. 2013; 8(10). <https://doi.org/10.1080/17441692.2013.860466> PMID: 24295049
20. Nath A. HIV/AIDS and Indian youth—a review of the literature (1980–2008). *SAHARA J*. 2009 Mar; 6 (1):2–8. <https://doi.org/10.1080/17290376.2009.9724923> PMID: 19399310
21. Orchard TR. Girl, woman, lover, mother: towards a new understanding of child prostitution among young Devadasis in rural Karnataka, India. *Soc Sci Med*. 2007 Apr; 64(12):2379–90. <https://doi.org/10.1016/j.socscimed.2007.02.031> PMID: 17412471
22. Pack AP, Sastry J, Tolley EE, Kaaya S, Headley J, Stakeholder acceptability of adolescent participation in clinical trials for biomedical HIV prevention products: Considerations from Tanzania and India. *AIDS Care* [Internet]. 2019; Available from: <https://www.tandfonline.com/doi/abs/10.1080/09540121.2018.1563285> PMID: 30596264
23. Parchure R, Darak S, Darak T, Kulkarni V. Mapping HIV risk trajectories from adolescence to young adulthood: a life-course study among unmarried urban Indian youth. *AIDS Care* [Internet]. 2021; Available from: <https://www.tandfonline.com/doi/abs/10.1080/09540121.2021.1985718> PMID: 34612095
24. Grant MJ, Booth A. A typology of reviews: An analysis of 14 review types and associated methodologies. Vol. 26, *Health Information and Libraries Journal*. 2009. <https://doi.org/10.1111/j.1471-1842.2009.00848.x> PMID: 19490148
25. Rodgers M, Sowden A, Petticrew M, Arai L, Roberts H, Britten N, et al. Testing methodological guidance on the conduct of narrative synthesis in systematic reviews: Effectiveness of interventions to promote smoke alarm ownership and function. *Evaluation*. 2009; 15(1).
26. Popay J, Roberts H, Sowden A, Petticrew M, Arai L, Rodgers M, et al. Narrative Synthesis in Systematic Reviews: A Product from the ESRC Methods Programme. *ESRC Methods Programme*. 2006;(2006).
27. Armijo-Olivo S, Stiles CR, Hagen NA, Biondo PD, Cummings GG. Assessment of study quality for systematic reviews: A comparison of the Cochrane Collaboration Risk of Bias Tool and the Effective Public Health Practice Project Quality Assessment Tool: Methodological research. *J Eval Clin Pract*. 2012; 18 (1). <https://doi.org/10.1111/j.1365-2753.2010.01516.x> PMID: 20698919
28. Tong A, Sainsbury P, Craig J. Consolidated criteria for reporting qualitative research (COREQ): A 32-item checklist for interviews and focus groups. *International Journal for Quality in Health Care*. 2007; 19 (6). <https://doi.org/10.1093/intqhc/mzm042> PMID: 17872937
29. Joshi RK, Mehendale SM. Determinants of consistently high HIV prevalence in Indian Districts: A multi-level analysis. *PLoS One*. 2019; 14(5). <https://doi.org/10.1371/journal.pone.0216321> PMID: 31063471

30. Singh SK, Vishwakarma D, Sharma SK. An Epidemiology of Premarital Sexual Behaviour in India: Exploring Gender Differences. *J Health Manag.* 2020; 22(3).
31. Kandwal R, Augustijn EW, Stein A, Miscione G, Garg PK, Garg RD. Geospatial analysis of HIV-Related social stigma: a study of tested females across mandals of Andhra Pradesh in India. *Int J Health Geogr.* 2010 Apr; 9:18. <https://doi.org/10.1186/1476-072X-9-18> PMID: 20380749
32. Biswas S, Ghosh P, Chakraborty D, Kumar A, Aggarwal S, Saha MK. Variation in injecting drug use behavior across different North-eastern States in India. *Indian J Public Health.* 2020 Apr; 64(Supplement):S71–S75. [https://doi.org/10.4103/ijph.IJPH\\_73\\_20](https://doi.org/10.4103/ijph.IJPH_73_20) PMID: 32295960
33. McManus A, Dhar L. Study of knowledge, perception and attitude of adolescent girls towards STIs/HIV, safer sex and sex education: (a cross sectional survey of urban adolescent school girls in South Delhi, India). *BMC Womens Health.* 2008 Jul; 8:12. <https://doi.org/10.1186/1472-6874-8-12> PMID: 18647417
34. Nambiar D, Rimal RN. Duty and destiny: psychometric properties and correlates of HIV-related stigma among youth NGO workers in Delhi, India. *AIDS Care.* 2012 Jan; 24(11):1384–91. <https://doi.org/10.1080/09540121.2011.648597> PMID: 22292453
35. Yadav SB, Makwana NR, Vadera BN, Dhaduk KM, Gandha KM. Awareness of HIV/AIDS among rural youth in India: a community based cross-sectional study. *J Infect Dev Ctries.* 2011 Oct; 5(10):711–6. <https://doi.org/10.3855/jidc.1488> PMID: 21997939
36. Singh N, Kumari R, Agarwal D, Jauhari S. Comparison of awareness and perception of menstrual hygiene between pre and postmenarchal adolescents of North India: A cross-sectional study. *J Family Med Prim Care.* 2021 Nov; 10(11):4168–75. [https://doi.org/10.4103/jfmprc.jfmprc\\_672\\_21](https://doi.org/10.4103/jfmprc.jfmprc_672_21) PMID: 35136784
37. Saha R, Paul P, Yaya S, Banke-Thomas A. Association between exposure to social media and knowledge of sexual and reproductive health among adolescent girls: evidence from the UDAYA survey in Bihar and Uttar Pradesh, India. *Reprod Health.* 2022 Aug; 19(1):178. <https://doi.org/10.1186/s12978-022-01487-7> PMID: 35978427
38. Ahuja VK, Patnaik S, Gurchandandeep, Lugani Y, Sharma N, Goyal S, et al. Perceptions and preferences regarding sex and contraception, amongst adolescents. *J Family Med Prim Care.* 2019 Oct; 8(10):3350–5. [https://doi.org/10.4103/jfmprc.jfmprc\\_676\\_19](https://doi.org/10.4103/jfmprc.jfmprc_676_19) PMID: 31742167
39. Sharanya T. Reproductive health status and life skills of adolescent girls dwelling in slums in Chennai, India. *National Medicine Journal of India* [Internet]. 2014; Available from: <http://archive.nmji.in/archives/Volume-27/Issue-6/Original-Article.pdf> PMID: 26133325
40. Tripathi N. Does family life education influence attitudes towards sexual and reproductive health matters among unmarried young women in India? *PLoS One.* 2021 Jan; 16(1):e0245883. <https://doi.org/10.1371/journal.pone.0245883> PMID: 33493186
41. Soletti AB, Guilamo-Ramos V, Burnette D, Sharma S, Bouris A. India-US collaboration to prevent adolescent HIV infection: the feasibility of a family-based HIV-prevention intervention for rural Indian youth. *J Int AIDS Soc.* 2009 Nov; 12:35. <https://doi.org/10.1186/1758-2652-12-35> PMID: 19925680
42. Madaan M, Agrawal S, Puri M, Meena J. Health profile of urban adolescent girls from India. *International journal of adolescent medicine and health* [Internet]. 2014; Available from: <https://www.degruyter.com/document/doi/10.1515/ijamh-2013-0513/html> PMID: 24535298
43. Jain R, Muralidhar S, Talwar R. Sexual resilience within intimate relations among unmarried adolescent girls seeking abortion in an abortion clinic of Delhi, India. *Indian J Sex Transm Dis AIDS.* 2014 Jan; 35(1):29–34. <https://doi.org/10.4103/0253-7184.132423> PMID: 24958983
44. Marak B, Bhatnagar T. Sexual behaviours and condom use among young urban women in a town in northeast India: Implications for prevention and control of sexually transmitted infections. *Clin Epidemiol Glob Health.* 2015; 3.
45. Chandrashekarappa S, Modi K, Krupp K, Ravi K, Khan A, Srinivas V, et al. Cohort profile: the Kisalaya cohort of mother-infant dyads in rural south India (2008–2012). *Epidemiol Health.* 2020 Mar; 42:e2020010. <https://doi.org/10.4178/epih.e2020010> PMID: 32164054
46. Silverman JG, Decker MR, Gupta J, Maheshwari A, Patel V, Raj A. HIV prevalence and predictors among rescued sex-trafficked women and girls in Mumbai, India. *J Acquir Immune Defic Syndr.* 2006 Dec; 43(5):588–93. <https://doi.org/10.1097/01.qai.0000243101.57523.7d> PMID: 17019369
47. Banandur P, Ramanaik S, Manhart LE, Buzdugan R, Mahapatra B, Isac S, et al. Understanding out-migration among female sex workers in South India. *Sex Transm Dis.* 2012; 39(10). <https://doi.org/10.1097/OLQ.0b013e3182641d90> PMID: 23001264
48. Sarkar K, Das SS, Pal R, Bal B, Madhusudan P, Chakraborti S. HIV infection and host genetic mutation among injecting drug-users of Northeastern States of India. *J Health Popul Nutr.* 2010; 28(2). <https://doi.org/10.3329/jhpn.v28i2.4882> PMID: 20411675

49. Gupta J, Raj A, Decker MR, Reed E, Silverman JG. HIV vulnerabilities of sex-trafficked Indian women and girls. *Int J Gynaecol Obstet*. 2009 Jul; 107(1):30–4. <https://doi.org/10.1016/j.ijgo.2009.06.009> PMID: 19625022
50. Pradhan MR, Ram U. Perceived gender role that shape youth sexual behaviour: Evidence from rural Orissa, India. *J Adolesc*. 2009 Nov; 33(4):543–51. <https://doi.org/10.1016/j.adolescence.2009.10.014> PMID: 19944457
51. Reed E, Gupta J, Biradavolu M, The context of economic insecurity and its relation to violence and risk factors for HIV among female sex workers in Andhra Pradesh, India. *Public health Reports [Internet]*. 2010; Available from: <https://journals.sagepub.com/doi/abs/10.1177/00333549101250S412> PMID: 20629253
52. Mishra S, Ramanaiik S, Blanchard JF, Halli S, Moses S, Raghavendra T, et al. Characterizing sexual histories of women before formal sex-work in south India from a cross-sectional survey: Implications for HIV/STI prevention. *BMC Public Health*. 2012; 12(1). <https://doi.org/10.1186/1471-2458-12-829> PMID: 23020789
53. Mehrotra P, Zimmerman RS, Noar SM, Dumenci L. A Test of an adapted multiple domain model in predicting sexual behaviors among unmarried young Adults in India. *J Sex Res*. 2013; 50(2). <https://doi.org/10.1080/00224499.2011.635321> PMID: 22206501
54. Arora SK, Shah D, Chaturvedi S, Gupta P. Defining and Measuring Vulnerability in Young People. *Indian J Community Med*. 2015 Jul; 40(3):193–7. <https://doi.org/10.4103/0970-0218.158868> PMID: 26170545
55. Bloom SS, Griffiths PL. Female autonomy as a contributing factor to women's HIV-related knowledge and behaviour in three culturally contrasting states in India. *J Biosoc Sci*. 2007; 39(4). <https://doi.org/10.1017/S0021932006001623> PMID: 17018172
56. Sgaier SK, Mony P, Jayakumar S, McLaughlin C, Arora P, Kumar R, et al. Prevalence and correlates of Herpes Simplex Virus-2 and syphilis infections in the general population in India. *Sex Transm Infect*. 2011; 87(2). <https://doi.org/10.1136/sti.2010.043687> PMID: 21059842
57. Kulkarni V, Joshi S, Gupte N, Parchure R, Darak S, Kulkarni S. Declining HIV prevalence among women attending antenatal care in Pune, India. *Trans R Soc Trop Med Hyg*. 2011; 105(6). <https://doi.org/10.1016/j.trstmh.2011.02.010> PMID: 21550094
58. Shastri S, Shet A, Rewari B, De Costa A. HIV-1 discordant couples in Karnataka, South India: is the sex ratio of index cases changing? *Int J STD AIDS*. 2012 Jul; 23(7):502–6. <https://doi.org/10.1258/ijsa.2011.011352> PMID: 22844005
59. Bhattacharjee P, Campbell L, Thalinja R, Nair S, Doddamane M, Ramanaiik S, et al. Understanding the Relationship Between Female Sex Workers and Their Intimate Partners: Lessons and Initial Findings From Participatory Research in North Karnataka, South India. *Health Education and Behavior*. 2018; 45(5). <https://doi.org/10.1177/1090198118763934> PMID: 29618240
60. Sabarwal S, Santhya KG. Treatment-seeking for symptoms of reproductive tract infections among young women in India. *Int Perspect Sex Reprod Health*. 2012 Jun; 38(2):90–8. <https://doi.org/10.1363/3809012> PMID: 22832149
61. Jejeebhoy SJ, Santhya KG, Singh SK, Rampal S, Saxena K. Provision of adolescent reproductive and sexual health services in India: Provider perspectives. Population Council: New Delhi. 2014;
62. Tripathi N, Sekher T V. Youth in India ready for sex education? Emerging evidence from national surveys. *PLoS One*. 2013 Aug; 8(8):e71584. <https://doi.org/10.1371/journal.pone.0071584> PMID: 23951197
63. Dyalchand A, Sinha G. Increased antenatal HIV testing among rural pregnant women: a community-based HIV prevention services program in rural Maharashtra, India. *Retrovirology*. 2010; 7(S1).
64. Sood S, Nambiar D. Comparative cost-effectiveness of the components of a behavior change communication campaign on HIV/AIDS in North India. *J Health Commun*. 2006; 11 Suppl 2:143–62. <https://doi.org/10.1080/10810730600974837> PMID: 17148103
65. Chhabra R, Springer C, Leu CS, Ghosh S, Sharma SK, Rapkin B. Adaptation of an alcohol and HIV school-based prevention program for teens. *AIDS Behav*. 2010 Aug; 14 Suppl 1(Suppl 1):S177–84. <https://doi.org/10.1007/s10461-010-9739-3> PMID: 20589528
66. Raj A, Saggurti N, Battala M, Nair S, Dasgupta A, Naik DD, et al. Randomized controlled trial to test the RHANI wives HIV intervention for women in India at risk for HIV from husbands. *AIDS Behav*. 2013; 17(9). <https://doi.org/10.1007/s10461-013-0586-x> PMID: 23921584
67. Washington RG, Nath A, Isac S, Javalkar P, Ramesh BM, Bhattacharjee P, et al. Evaluation of a community-based HIV preventive intervention for female sex workers in rural areas of Karnataka state, south India. *Asia Pac J Public Health*. 2014; 26(4). <https://doi.org/10.1177/1010539514537677> PMID: 24871816

68. Gaikwad SS, Bhende A, Nidhi G, Saggurti N, Ranebennur V. How effective is community mobilization in HIV prevention among highly diverse sex workers in urban settings? The Aastha intervention experience in Mumbai and Thane districts, India. *J Epidemiol Community Health* (1978). 2012; 66 Suppl 2.
69. Parimi P, Mishra RM, Tucker S, Saggurti N. Mobilising community collectivization among female sex workers to promote STI service utilization from the government healthcare system in Andhra Pradesh, India. *J Epidemiol Community Health* (1978). 2012; 66 Suppl 2.
70. Galavotti C, Wheeler T, Kuhlmann AS, Saggurti N, Narayanan P, Kiran U, et al. Navigating the swampy lowland: a framework for evaluating the effect of community mobilization in female sex workers in Avahan, the India AIDS Initiative. *J Epidemiol Community Health* (1978). 2012; 66 Suppl 2.
71. Narayanan P, Moulasha K, Wheeler T, Baer J, Bharadwaj S, Ramanathan T V., et al. Monitoring community mobilization and organizational capacity among high-risk groups in a large-scale HIV prevention programme in India: selected findings using a Community Ownership and Preparedness Index. *J Epidemiol Community Health* (1978). 2012; 66 Suppl 2.
72. Alary M, Banandur P, Rajaram SP, Thamattoor UK, Mainkar MK, Paranjape R, et al. Increased HIV prevention program coverage and decline in HIV prevalence among female sex workers in South India. *Sex Transm Dis*. 2014; 41(6). <https://doi.org/10.1097/OLQ.000000000000138> PMID: 24825335
73. Krishnamoorthy Y, Majella MG, Rajaa S, Bharathi A, Saya GK. Spatial pattern and determinants of HIV infection among adults aged 15 to 54 years in India—Evidence from National Family Health Survey-4 (2015–16). *Tropical Medicine and International Health*. 2021; 26(5).
74. Agrawal A, Bloom SS, Suchindran C, Curtis S, Angeles G. Gender-based power and couples' HIV risk in Uttar Pradesh and Uttarakhand, North India. *Int Perspect Sex Reprod Health*. 2014; 40(4). <https://doi.org/10.1363/4019614> PMID: 25565347
75. Mehta SH, Gupta A, Sahay S, Godbole S V., Joshi SN, Reynolds SJ, et al. High HIV prevalence among a high-risk subgroup of women attending sexually transmitted infection clinics in Pune, India. *J Acquir Immune Defic Syndr* (1988). 2006; 41(1). <https://doi.org/10.1097/01.qai.0000174653.17911.4a> PMID: 16340477
76. Aridoss S, Jaganathasamy N, Kumar A, Natesan M, Adhikary R, Arumugam E. Socio-demographic factors associated with HIV prevalence among pregnant women attending antenatal clinics in six Southern States of India: Evidence from the latest round of HIV sentinel surveillance. *Indian J Public Health*. 2020; 64.
77. Arumugam E, Aridoss S, David JK, Jaganathasamy N, Balasubramanian G, Natesan M, et al. Injecting drug use & HIV prevalence among female sex workers: Evidence from the National Integrated Biological & Behavioural Surveillance, India. *Indian Journal of Medical Research*. 2022; 155(3).
78. Shahmanesh M, Cowan F, Wayal S, Copas A, Patel V, Mabey D. The burden and determinants of HIV and sexually transmitted infections in a population-based sample of female sex workers in Goa, India. *Sex Transm Infect*. 2009; 85(1).
79. Joshua V, Selvaraj V, Subramanian T, Girish Kumar CP, Ramakrishnan L, Goswami P, et al. Spatial modelling of HIV prevalence among the clients of female sex workers in Tamil Nadu, south India. *Indian Journal of Medical Research, Supplement*. 2012; 136(SUPPL).
80. Reed E, Gupta J, Biradavolu M, Devireddy V, Blankenship KM. The context of economic insecurity and its relation to violence and risk factors for HIV among female sex workers in Andhra Pradesh, India. *Public Health Reports*. 2010; 125(SUPPL. 4). <https://doi.org/10.1177/00333549101250S412> PMID: 20629253
